# Supplementary material
Source: PubMed Central journal article supplement (PMC3431568)
Supplement: supp_jc.2012-1614_12-1614_supp_tab.pdf [file supp_jc.2012-1614_12-1614_supp_tab.pdf]

**Supplemental Table 1. Unstandardized SEM Estimates Relating Sequential Hormone/SHBG and Waist Circumference Measurements to Each Other.**

|                                           | Waist →Hormone<br>(Red Arrows) | Hormone→Waist<br>(Blue Arrows) | Hormone→Hormone<br>(Upper Black Arrows) | Waist →Waist<br>(Lower Black Arrows) |
|-------------------------------------------|--------------------------------|--------------------------------|-----------------------------------------|--------------------------------------|
| <b>SHBG</b>                               |                                |                                |                                         |                                      |
| Visit 0→Visit 3                           | -0.09 nM**                     | 0.01 cm                        | 0.63 nM***                              | 0.98 cm***                           |
| Visit 3→Visit 6                           | -0.07 nM*                      | <-0.01 cm                      | 0.76 nM***                              | 0.94 cm***                           |
| Visit 6→Visit 9                           | -0.25 nM***                    | <0.01 cm                       | 0.57 nM***                              | 0.95 cm***                           |
| <b>Testosterone</b>                       |                                |                                |                                         |                                      |
| Visit 0→Visit 3                           | 0.16 ng/dL ***                 | <0.01 cm                       | 0.26 ng/dL ***                          | 0.98 cm***                           |
| Visit 3→Visit 6                           | 0.11 ng/dL ***                 | -0.01 cm                       | 0.53 ng/dL ***                          | 0.95 cm***                           |
| Visit 6→Visit 9                           | 0.08 ng/dL **                  | 0.01 cm                        | 0.75 ng/dL ***                          | 0.95 cm***                           |
| <b>FSH†</b>                               |                                |                                |                                         |                                      |
| Visit 0→Visit 3                           | -0.11 mIU/mL ***¥              | -0.02 cm                       | 6.58 mIU/mL ***¥                        | 0.98 cm***                           |
| Visit 3→Visit 6                           | -0.18 mIU/mL ***¥              | -0.01 cm                       | 4.15 mIU/mL ***¥                        | 0.94 cm***                           |
| Visit 6→Visit 9                           | -0.82 mIU/mL ***¥              | 0.05 cm                        | 2.22 mIU/mL ***¥                        | 0.95 cm***                           |
| <b>Estradiol†</b>                         |                                |                                |                                         |                                      |
| <b>Premenopausal/Early Perimenopausal</b> |                                |                                |                                         |                                      |
| Visit 0→Visit 3                           | -0.55 pg/mL ***¥               | 0.52 cm                        | 17.54 pg/mL ***¥                        | 0.94 cm***                           |
| Visit 3→Visit 6                           | 0.35 pg/mL ¥                   | -0.64 cm*                      | 7.61 pg/mL ***¥                         | 0.94 cm***                           |
| <b>Late Perimenopausal/Postmenopausal</b> |                                |                                |                                         |                                      |
| Visit 3→Visit 6                           | 0.69 pg/mL ***¥                | -0.67 cm*                      | 1.38 pg/mL ¥                            | 0.95 cm***                           |
| Visit 6→Visit 9                           | 0.22 pg/mL ***¥                | -0.15 cm                       | 5.11 pg/mL ***¥                         | 0.98 cm***                           |

\*P<0.05; \*\*P<0.01; \*\*\*P<0.001

†Estimates provided are back-transformed from models using Log2(FSH) and Log2(Estradiol)

¥Estimates provided are interpreted as the increase or decrease in FSH or estradiol, respectively, at the subsequent visit for a woman with average FSH or estradiol values, respectively, at the prior visit
